# Supplementary material for: Size-Optimized Microspace Culture Facilitates Differentiation of Mouse Induced Pluripotent Stem Cells into Osteoid-Rich Bone Constructs
Source: Hindawi journal article supplement (doi:10.1155/2020/7082679), 2020-05-14
Supplement: f1 [file 7082679.f1.pdf]

## **Supplementary Materials and Methods** (see “Supplementary Figure 3” for results)

### *1. Osteoinductivity assessment of OI-iPSC constructs*

#### *1.1. Osteoinductivity assessment of secreted factors from OI-iPSC constructs*

Human bone marrow-derived MSCs sorted by  $\text{LNGFR}^+/\text{THY-1}^+$  (LT-MSCs) [Mabuchi Y. *et al.*, *Stem Cell Reports*, 1: 152-65, 2013] were kindly provided by Dr. Y Mabuchi (Tokyo Medical and Dental University, Tokyo, Japan). LT-MSCs were cultured in growth medium (GM) containing Dulbecco's modified Eagle's medium (DMEM with 4.5 g/L glucose and without sodium pyruvate; Nacalai Tesque), 20% FBS (Hyclone), 1% penicillin-streptomycin (Wako Pure Chemical), 10 mM HEPES (Dojindo), and 10 ng/mL recombinant human basic fibroblast growth factor (bFGF; Wako Pure Chemical). LT-MSCs were maintained in GM until the cells reached 80% confluence.

Conditioned medium (CM) was collected from OI-iPSC constructs in the Elp500 condition at day 35. Then, LT-MSCs were prepared in 24-well plates and maintained in GM or OS medium with and without 10  $\mu\text{L/mL}$  CM for 14 days. Half medium change was performed every 3 days. Subsequently, the cells were fixed with 10% neutral-buffered formalin solution (Wako Pure Chemical) prior to staining with von Kossa and methylene blue.

#### *1.2. Osteoinductivity assessment of inactivated (freeze-dried) OI-iPSC constructs*

OI-iPSC constructs were collected from Elp500 wells at day 35 and washed twice with PBS (Wako). Next, the constructs were pre-frozen at  $-80\text{ }^{\circ}\text{C}$  overnight and subsequently transferred to a freeze-drying device (VD-250R; Taitec, Koshigaya, Japan) to inactivate the cells in the constructs at  $-10\text{ }^{\circ}\text{C}$  under  $-0.1\text{ MPa}$  overnight.

LT-MSCs ( $2 \times 10^4$  cells/ $\text{cm}^2$ ) were plated in 6-cm dishes containing freeze-dried OI-iPSC constructs from the Elp500 condition and maintained for 1 day. Next, GM was replaced by osteogenic medium (Zen-Bio, NC, USA) and the culture was maintained for 14 days. Half medium change was performed every 3 days. Then, the cells were fixed in 10% neutral-buffered formalin solution (Wako Pure Chemical) and subsequently stained using Alizarin Red S and von Kossa to detect mineralization nodules.

**Supplementary Table 1: Primers used for SYBR Green real-time RT-PCR.**

| Description<br>(gene name)      | Primers (Fw, forward; Rv, reverse)                                | Product<br>size (bp) | Accession number (reference)                                                           |
|---------------------------------|-------------------------------------------------------------------|----------------------|----------------------------------------------------------------------------------------|
| <i>E-cadherin (CDH1)</i>        | Fw: 5'-GTCTCCTCATGGCTTTGC-3'<br>Rv: 5'-CTTTAGATGCCGCTTCAC-3'      | 228                  | NM_009864.3 (Xiang X. et al., <i>PLoS One</i> , 7: e50781, 2012)                       |
| <i>Runx2 (Runx2)</i>            | Fw: 5'-CGGGCTACCTGCCATCAC-3'<br>Rv: 5'-GGCCAGAGGCAGAAGTCAGA-3'    | 78                   | NM_001146038.2 (Speer M. Y. et al., <i>J Cell Biochem</i> , 110: 935–947, 2010)        |
| <i>Osterix (Sp7)</i>            | Fw: 5'-CTCGTCTGACTGCCTGCCTAG-3'<br>Rv: 5'-GCGTGGATGCCTGCCTTGTA-3' | 84                   | NM_130458.3 (Fowlkes J. L. et al., <i>Endocrinology</i> , 149: 1697–1704, 2008)        |
| <i>Collagen 1a1 (Col1a1)</i>    | Fw: 5'-TGTCCTAACCCCAAAGAC-3'<br>Rv: 5'-CCCTCGACTCCTACATCTTCTGA-3' | 92                   | NM_007742.3 (Kaback L. A. et al., <i>J Cell Biochem</i> , 105: 219–226, 2008)          |
| <i>Osteocalcin (Bglap)</i>      | Fw: 5'-CCGGGAGCAGTGTGAGCTTA-3'<br>Rv: 5'-AGGCGGTCTTCAAGCCATACT-3' | 68                   | NM_007541.3 (Jadlowiec J. et al., <i>J Biol Chem</i> , 279: 53323–53330, 2004)         |
| <i>Osteopontin (Spp1)</i>       | Fw: 5'-TCTCCTTGCGCCACAGAATG-3'<br>Rv: 5'-TCCTTAGACTCACCGCTCTT-3'  | 399                  | NM_001204201.1 (Yang J. et al., <i>Int J Mol Med</i> , 39: 1605-1612, 2017)            |
| <i>Bone sialoprotein (Ibsp)</i> | Fw: 5'-CGGAGGAGACAACGGAGAAG-3'<br>Rv: 5'-GTAAGTGTGCCACGAGGCT-3'   | 295                  | NM_008318.3 (Bouet G. et al., <i>PLoS One</i> , 10: e0117402, 2015)                    |
| <i>18s rRNA</i>                 | Fw: 5'-GTAACCCGTTGAACCCCAT-3'<br>Rv: 5'-CCATCCAATCGGTAGTAGCG-3'   | 151                  | X00686 (Valamehr B. et al., <i>Proc Natl Acad Sci U S A.</i> , 105: 14459-14464, 2008) |

Elp400

Elp500

Elp900

0 hr

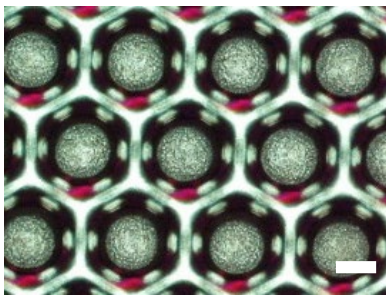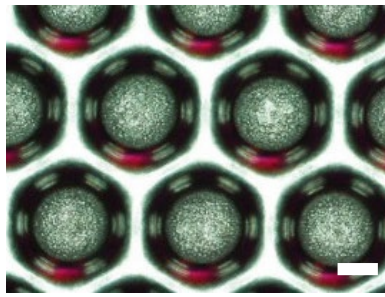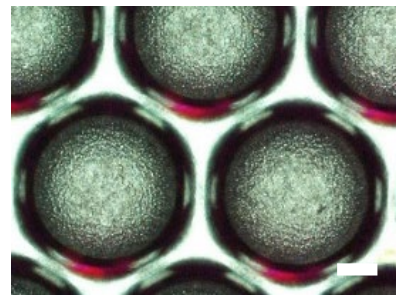

6 hrs

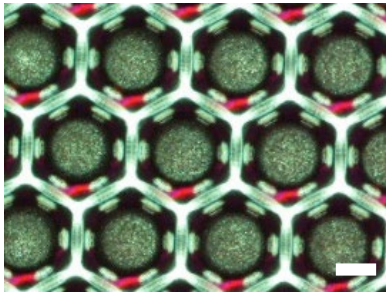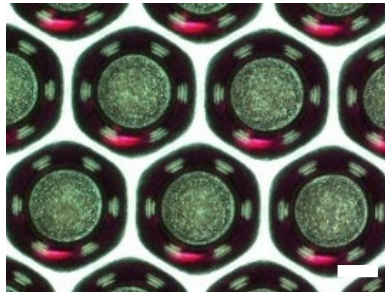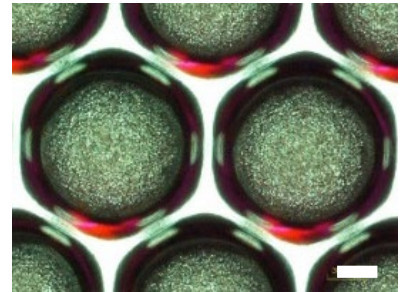

12 hrs

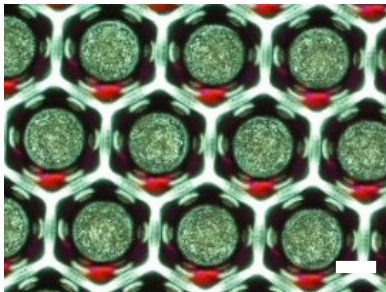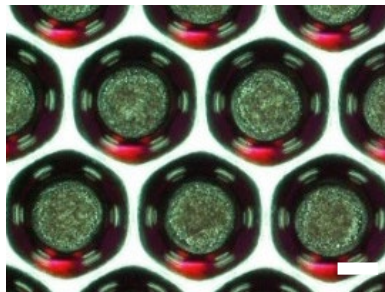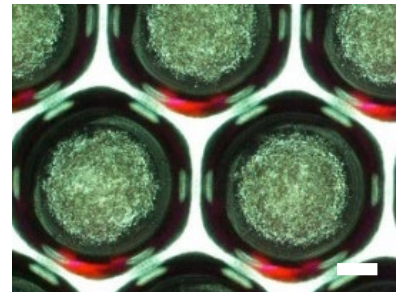

24 hrs

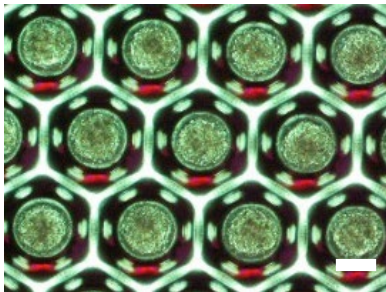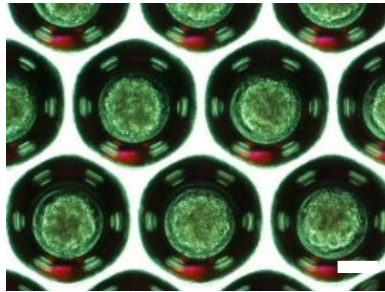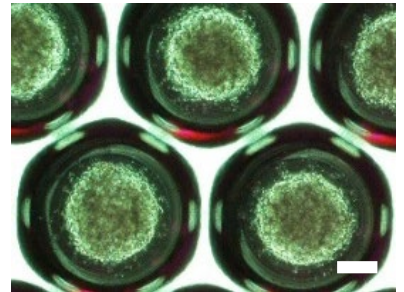

48 hrs

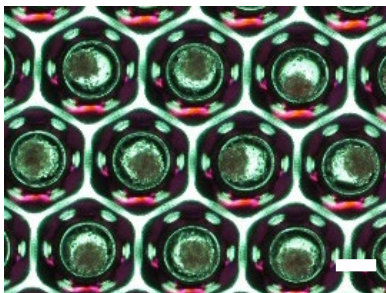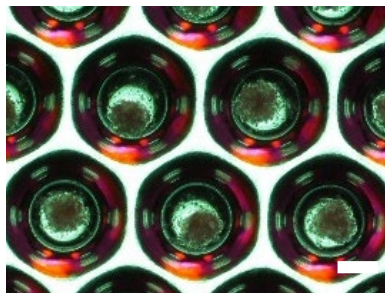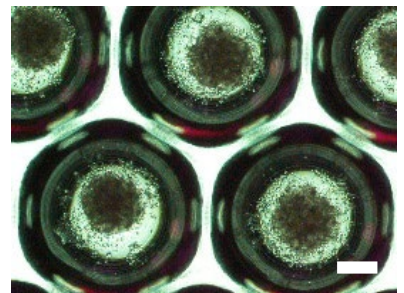



## Osteogenic induction (Days)

21

28

35

Elp400

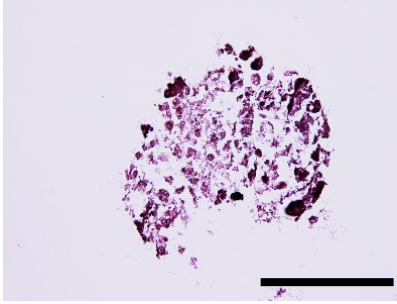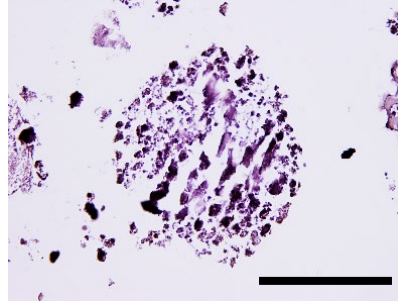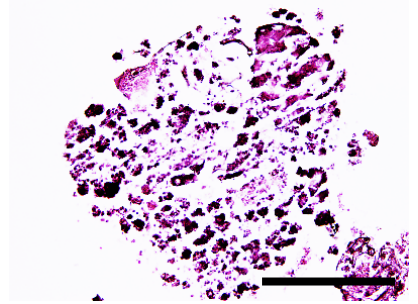

Elp500

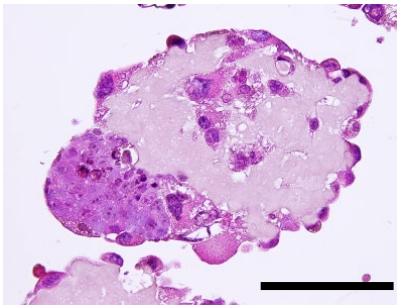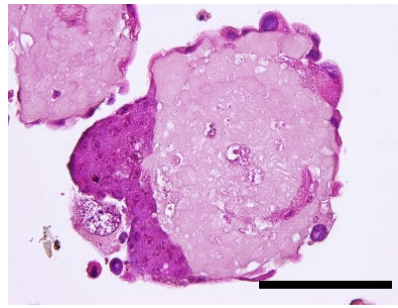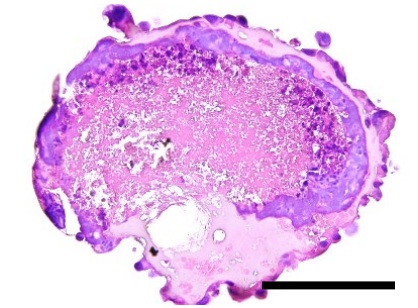

Elp900

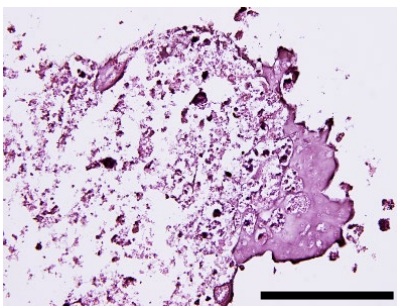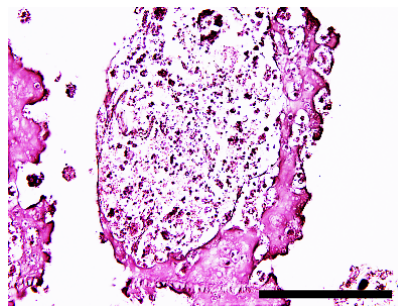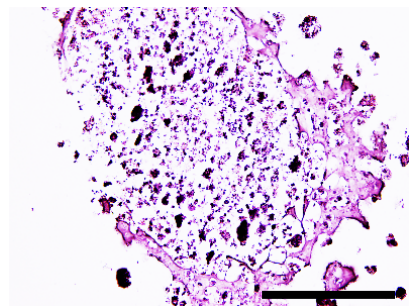

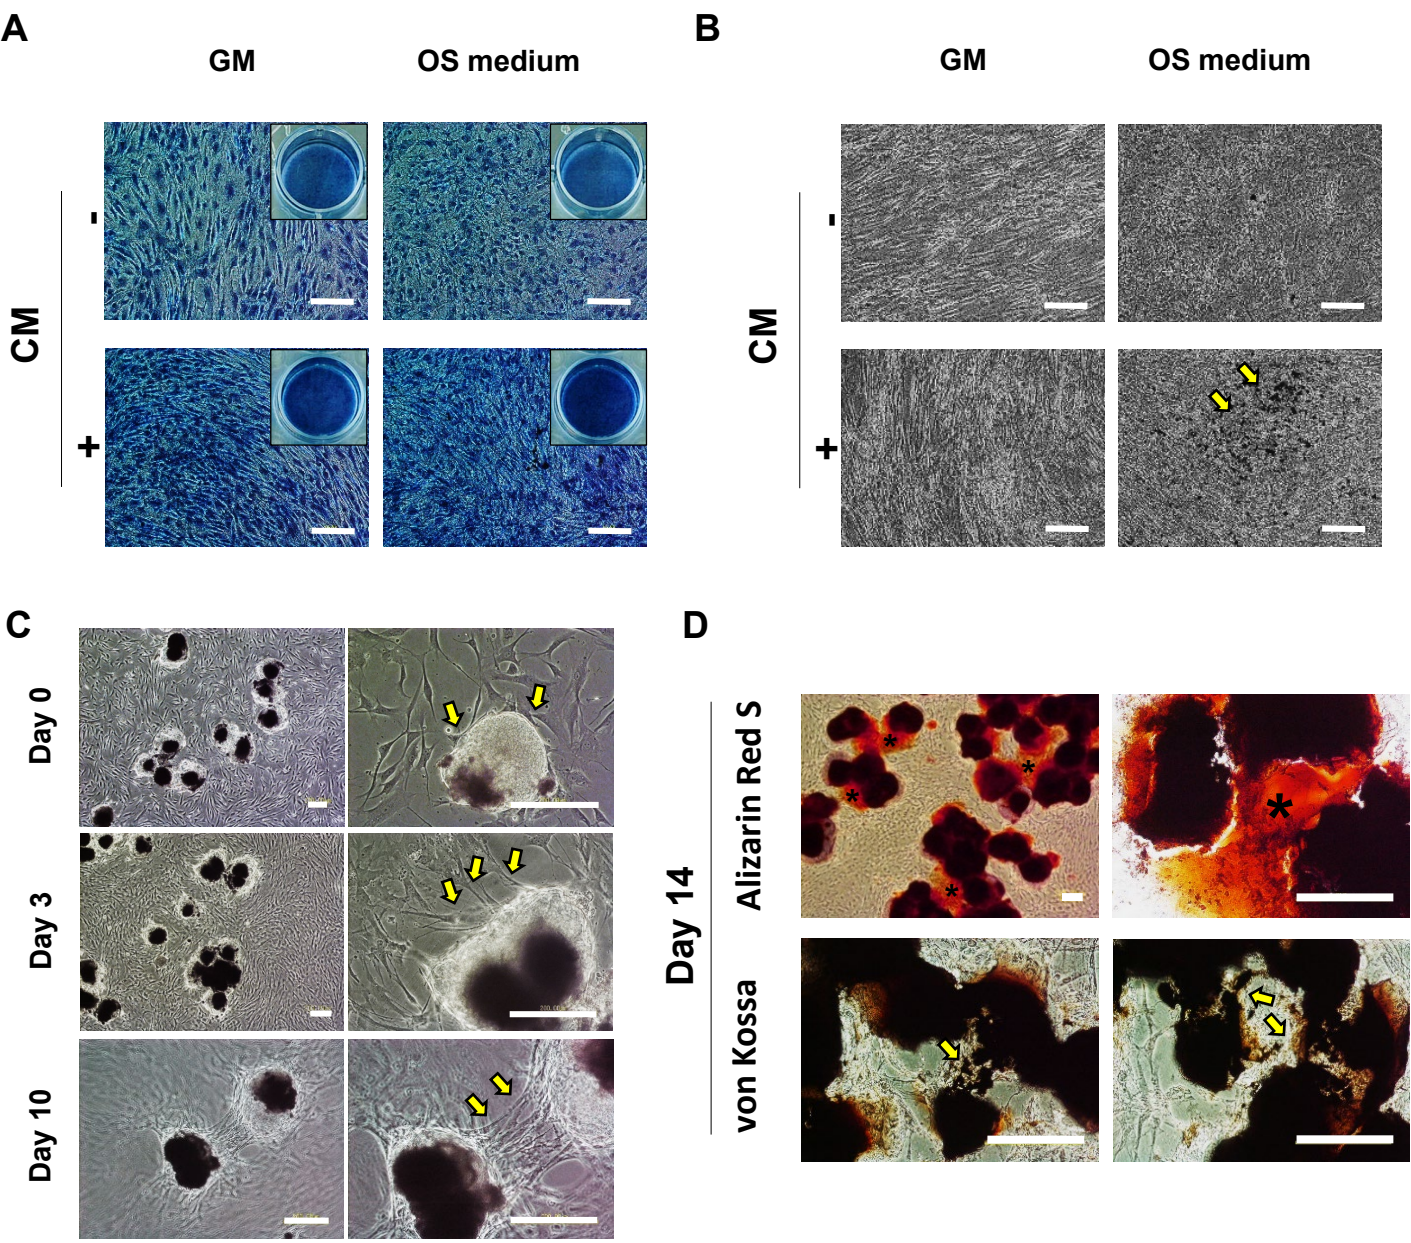

Supp Figure 3
